# Supplementary material for: Quality of Life Post Heart Failure Diagnosis: Population-Level Trends in the U.S
Source: Research Square preprint supplement (doi:10.21203/rs.3.rs-5672161/v1), 2024-12-25
Supplement: Supplementary file 1 [file 27fa845a9573576875a0ea68.docx]

**Additional File 1**

**Title: Appendices**

**Appendix A: Variables used in the analysis**

| Question | Variable name and dataset |
| --- | --- |
| Ever told [SUBJECT] had congestive heart failure? | MCQ160B |
| Current age* | RIDAGEYR |
| Age of HF diagnosis | MCQ180b (NHANES 2016), MCD180b (NHANES 2017-2020) |
| HD physical | HSQ470 |
| HD mental | HSQ480 |
| Sex | RIAGENDR |
| Race | RIDRETH1 |
| Insurance status | NHANES 2001-2004: HID010; HID030A; HID030B; HID030C; HIQ210NHANES 2005- : HIQ011; HIQ031A; HIQ031B; HIQ031D; HIQ031AA |
| Weights used | WTINT2YR; SDMVPSU; SDMVSTRA |

*This variable is top-coded at age=85 for all cohorts after 2003-2004

**Appendix B. Cohorts and data availability**

| Cohort | Total number of responders | Responders older than 18 | Percentage of responders older than 18 with Complete Data* |
| --- | --- | --- | --- |
| 2001-2002 | 11,039 | 5,993 | 5,294 |
| 2003-2004 | 10,122 | 5,620 | 4,841 |
| 2005-2006 | 10,348 | 5,563 | 4,876 |
| 2007-2008 | 10,149 | 6,228 | 5,499 |
| 2009-2010 | 10,537 | 6,527 | 5,614 |
| 2011-2012 | 9,756 | 5,864 | 4,990 |
| **Total** | 61,961 | 35,795 | 31,114 |

*across all variables in Appendix A.

**Appendix C. Estimated EQ-5D Index scores from the number of HD by age from Jia and Lubetkin (2008)**

| Healthy Days | 18-24 Years | 25-44 Years | 45-64 Years | 65-74 Years | 75+ years |
| --- | --- | --- | --- | --- | --- |
| 30 | 0.999 | 0.998 | 0.968 | 0.905 | 0.883 |
| 29 | 0.998 | 0.995 | 0.834 | 0.823 | 0.811 |
| 28 | 0.997 | 0.949 | 0.827 | 0.817 | 0.806 |
| 27 | 0.994 | 0.842 | 0.823 | 0.809 | 0.795 |
| 26 | 0.992 | 0.833 | 0.818 | 0.802 | 0.782 |
| 25 | 0.914 | 0.827 | 0.809 | 0.796 | 0.778 |
| 24 | 0.843 | 0.824 | 0.803 | 0.784 | 0.776 |
| 23 | 0.839 | 0.821 | 0.8 | 0.779 | 0.773 |
| 22 | 0.832 | 0.816 | 0.797 | 0.776 | 0.77 |
| 21 | 0.829 | 0.811 | 0.795 | 0.776 | 0.769 |
| 20 | 0.826 | 0.804 | 0.787 | 0.773 | 0.764 |
| 19 | 0.824 | 0.801 | 0.778 | 0.77 | 0.758 |
| 18 | 0.823 | 0.8 | 0.777 | 0.769 | 0.756 |
| 17 | 0.821 | 0.799 | 0.776 | 0.768 | 0.753 |
| 16 | 0.817 | 0.798 | 0.773 | 0.765 | 0.716 |
| 15 | 0.805 | 0.793 | 0.767 | 0.74 | 0.708 |
| 14 | 0.8 | 0.781 | 0.761 | 0.711 | 0.706 |
| 13 | 0.799 | 0.776 | 0.759 | 0.711 | 0.706 |
| 12 | 0.797 | 0.773 | 0.757 | 0.71 | 0.705 |
| 11 | 0.797 | 0.771 | 0.755 | 0.71 | 0.705 |
| 10 | 0.794 | 0.767 | 0.717 | 0.708 | 0.704 |
| 9 | 0.789 | 0.763 | 0.709 | 0.707 | 0.702 |
| 8 | 0.779 | 0.76 | 0.708 | 0.706 | 0.701 |
| 7 | 0.773 | 0.758 | 0.708 | 0.706 | 0.701 |
| 6 | 0.771 | 0.754 | 0.707 | 0.706 | 0.7 |
| 5 | 0.768 | 0.716 | 0.706 | 0.705 | 0.699 |
| 4 | 0.766 | 0.71 | 0.705 | 0.705 | 0.695 |
| 3 | 0.765 | 0.709 | 0.705 | 0.705 | 0.694 |
| 2 | 0.763 | 0.708 | 0.704 | 0.704 | 0.692 |
| 1 | 0.76 | 0.706 | 0.704 | 0.703 | 0.689 |
| 0 | 0.528 | 0.479 | 0.464 | 0.453 | 0.441 |
